# Supplementary material
Source: HighWire-hosted journal article supplement (https://jnm.snmjournals.org/highwire/filestream/93990/field_highwire_adjunct_files/0/58131_supplemental_table_1.pdf)
Supplement: 58131_supplemental_table_1.pdf [file 58131_supplemental_table_1.pdf]

| Supplemental Table 1 – Summary of some <sup>11</sup> C tracer dosimetry studies |                                                       |                                                                              |               |
|---------------------------------------------------------------------------------|-------------------------------------------------------|------------------------------------------------------------------------------|---------------|
| Radiotracer                                                                     | Effective Dose<br>(mSv MBq <sup>-1</sup> )            | Top Organ & Dose<br>(mSv MBq <sup>-1</sup> )                                 | Reference     |
| [ <sup>11</sup> C]ABP688                                                        | 3.7 × 10 <sup>-3</sup><br>(effective dose equivalent) | Liver<br>1.6 × 10 <sup>-2</sup>                                              | (1)           |
| [ <sup>11</sup> C]Acetate                                                       | 4.9 × 10 <sup>-3</sup>                                | Pancreas<br>1.7 × 10 <sup>-2</sup>                                           | (2)           |
| [ <sup>11</sup> C]DASB                                                          | 7.0 × 10 <sup>-3</sup>                                | Lung<br>3.2 × 10 <sup>-2</sup>                                               | (3)           |
| [ <sup>11</sup> C]Glucose                                                       | 4.3 × 10 <sup>-3</sup>                                | Brain<br>1.2 × 10 <sup>-2</sup>                                              | (4)           |
| [ <sup>11</sup> C]Methionine                                                    | 5.2 × 10 <sup>-3</sup>                                | Pancreas<br>2.3 × 10 <sup>-2</sup>                                           | (5)           |
| [ <sup>11</sup> C]Methoxyprogabidic acid                                        | 4.8 × 10 <sup>-3</sup>                                | Small intestine<br>3.1 × 10 <sup>-2</sup><br>only “Critical organs“ reported | (6)           |
| [ <sup>11</sup> C]Mirtazapine                                                   | 6.8 × 10 <sup>-3</sup>                                | Lungs<br>3.2 × 10 <sup>-2</sup>                                              | (7)           |
| [ <sup>11</sup> C]MP4B                                                          | 4.2 × 10 <sup>-3</sup>                                | Urinary Bladder Wall<br>1.9 × 10 <sup>-2</sup>                               | (8)           |
| [ <sup>11</sup> C]NNC 112                                                       | 5.7 × 10 <sup>-3</sup>                                | Gallbladder wall<br>3.2 × 10 <sup>-2</sup>                                   | (9)           |
| [ <sup>11</sup> C]NPA                                                           | 6.7 × 10 <sup>-3</sup>                                | Gallbladder wall<br>2.8 × 10 <sup>-2</sup>                                   | Current study |
| [ <sup>11</sup> C]Raclopride                                                    | 6.3 × 10 <sup>-3</sup>                                | Gallbladder<br>3.2 × 10 <sup>-2</sup>                                        | (10)          |
| [ <sup>11</sup> C]Raclopride                                                    | 6.7 × 10 <sup>-3</sup>                                | Kidneys<br>4.1 × 10 <sup>-2</sup>                                            | (11)          |
| [ <sup>11</sup> C]WAY100635                                                     | 14.1 × 10 <sup>-3</sup>                               | Urinary bladder wall<br>19 × 10 <sup>-2</sup>                                | (12)          |

## SUPPLEMENTAL REFERENCES

1. Treyer V, Streffer J, Ametamey SM, et al. Radiation dosimetry and biodistribution of <sup>11</sup>C-ABP688 measured in healthy volunteers. *European Journal of Nuclear Medicine and Molecular Imaging*. Apr 2008;35(4):766-770.
2. Seltzer MA, Jahan SA, Sparks R, et al. Radiation dose estimates in humans for C-11-acetate whole-body PET. *Journal of Nuclear Medicine*. Jul 2004;45(7):1233-1236.
3. Lu JQ, Ichise M, Liow JS, Ghose S, Vines D, Innis RB. Biodistribution and radiation dosimetry of the serotonin transporter ligand C-11-DASB determined from human whole-body PET. *Journal of Nuclear Medicine*. 2004;45(9):1555-1559.
4. Graham MM, Peterson LM, Muzi M, et al. 1-[Carbon-11]-glucose radiation dosimetry and distribution in human imaging studies. *Journal of Nuclear Medicine*. Oct 1998;39(10):1805-1810.
5. Deloar HM, Fujiwara T, Nakamura T, et al. Estimation of internal absorbed dose of L-[methyl-C-11]methionine using whole-body positron emission tomography. *European Journal of Nuclear Medicine*. Jun 1998;25(6):629-633.
6. Santens P, De Vos F, Thierens H, et al. Biodistribution and dosimetry of carbon-11-methoxyprogabidic acid, a possible ligand for GABA-receptors in the brain. *Journal of Nuclear Medicine*. Feb 1998;39(2):307-310.
7. Marthi K, Hansen SB, Jakobsen S, Bender D, Smith SB, Smith DF. Biodistribution and radiation dosimetry of [N-methyl-C-11]mirtazapine, an antidepressant affecting adrenoceptors. *Applied Radiation and Isotopes*. Aug-Sep 2003;59(2-3):175-179.
8. Virta JR, Tolvanen T, Nagren K, Bruck A, Roivainen A, Rinne JO. 1-C-11-Methyl-4-piperidiny-N-butyrates radiation dosimetry in humans by dynamic organ-specific evaluation. *Journal of Nuclear Medicine*. Mar 2008;49(3):347-353.
9. Copley VL, Fujita M, Musachio JL, et al. Whole-body biodistribution and estimation of radiation-absorbed doses of the dopamine D-1 receptor radioligand C-11-NNC 112 in humans. *Journal of Nuclear Medicine*. Jan 2006;47(1):100-104.
10. Slifstein M, Hwang DR, Martinez D, et al. Biodistribution and radiation dosimetry of the dopamine D-2 ligand C-11-raclopride determined from human whole-body PET. *Journal of Nuclear Medicine*. Feb 2006;47(2):313-319.
11. Ribeiro MJ, Ricard M, Bourgeois S, et al. Biodistribution and radiation dosimetry of [<sup>11</sup>C]-raclopride in healthy volunteers. *European Journal of Nuclear Medicine and Molecular Imaging*. Aug 2005;32(8):952-958.
12. Parsey RV, Belanger MJ, Sullivan GM, et al. Biodistribution and radiation dosimetry of C-11-WAY100,635 in humans. *Journal of Nuclear Medicine*. Apr 2005;46(4):614-619.
